# Supplementary material for: Marine microalgae commercial production improves sustainability of global fisheries and aquaculture
Source: PubMed Central journal article supplement (PMC6180066; doi:10.1038/s41598-018-33504-w), 2018-10-10
Supplement: 41598_2018_33504_MOESM1_ESM.pdf [file 41598_2018_33504_MOESM1_ESM.pdf]

## SUPPLEMENTARY INFORMATION

Marine microalgae commercial production improves sustainability of global fisheries and aquaculture

Colin M. Beal<sup>1,2</sup>, Léda N. Gerber<sup>2</sup>, Supis Thongrod<sup>3</sup>, Wutiporn Phromkunthong<sup>4</sup>,  
Viswanath Kiron<sup>5</sup>, Joe Granados<sup>2</sup>, Ian Archibald<sup>2,6</sup>, Charles H. Greene<sup>2,7</sup>, Mark E.  
Huntley\*<sup>2,8</sup>

<sup>1</sup> B&D Engineering and Consulting LLC, 7419 State Hwy 789, Lander, WY 82520,  
United States

<sup>2</sup> University of Hawaii at Hilo, Pacific Aquaculture & Coastal Resources Center, College  
of Agriculture, Forestry, and Natural Resource Management, 200 W. Kawili St., HI  
95720, United States

<sup>3</sup> Thai Union Feedmill Co., Ltd., 89/1 Moo2, Tambon Kalong, Amphoe Muang,  
Samutskorn Province, Thailand 74000

<sup>4</sup> Prince of Songkla University, Department of Aquatic Science, Faculty of Natural  
Resources, Hat Yai, Songkhla Province, Thailand 90112

<sup>5</sup> Nord University, Faculty of Biosciences and Aquaculture, 8049 Bodo, Norway

<sup>6</sup> Cinglas Ltd, Chester, United Kingdom

<sup>7</sup> Cornell University, Department of Earth and Atmospheric Sciences, 4120 Snee Hall,  
Ithaca, NY 14853, United States

<sup>8</sup> Cornell University, Department of Animal Sciences, 149 Morrison Hall, Ithaca, NY  
14853, United States

\* Corresponding author. Tel: +1(808) 640-4239, E-mail address: [meh333@cornell.edu](mailto:meh333@cornell.edu)

Supplementary Table S1. Capital costs for a 111-ha facility in Thailand.

| Item                                    | Cost (\$/ha) |
|-----------------------------------------|--------------|
| Water Supply Equipment                  | 27,400       |
| Water Supply/Discharge Piping           | 170          |
| PBR System                              | 1,420        |
| PBR Piping                              | 5,390        |
| Pond System                             | 77,100       |
| Pond Piping                             | 28,800       |
| CO2 Piping                              | 50           |
| Secondary Settlers (earthworks & liner) | 315          |
| Ring Dryer                              | 14,300       |
| Filter Press                            | 10,400       |
| Instrumentation + control               | 6,550        |
| Other Piping                            | 40.0         |
| Electrical                              | 11,500       |
| Buildings                               | 30,800       |
| Land preparation                        | 20,600       |
| Other                                   | 26,000       |
|                                         |              |
| Cultivation Total (\$/ha)               | 261,000      |
| Cultivation Total (\$)                  | 29,000,000   |
| Processing Total (\$/ha)                | 2,590        |
| Processing Total (\$)                   | 289,000      |
| Total Cost \$                           | 29,300,000   |

Supplementary Table S2. Labor costs for facility in Thailand

| Thailand             | Per Employee            |          |          |          |           |      |               |
|----------------------|-------------------------|----------|----------|----------|-----------|------|---------------|
|                      |                         | Base     | Fringe   | Hourly   | Annual    | No.  | Total         |
| Position             | Function                | (\$ h-1) | (\$ h-1) | (\$ h-1) | (\$ yr-1) | FTE  | (\$000s yr-1) |
| Operations Staff     |                         |          |          |          |           |      |               |
| Harvest technician   | Harvest/inoculate ponds | \$1.72   | \$0.60   | \$2.33   | \$4,750   | 17.0 | \$80.69       |
| Processing tech      | Operate processing eq.  | \$2.32   | \$0.81   | \$3.13   | \$6,380   | 3.0  | \$19.15       |
| Plant engineer       | Plant maintenance       | \$3.60   | \$1.26   | \$4.86   | \$9,910   | 5.0  | \$49.57       |
| Lab technician       | Scale-up + QA/QC        | \$3.56   | \$1.25   | \$4.81   | \$9,820   | 10.0 | \$98.17       |
| IT engineer          | Process control system  | \$5.06   | \$1.77   | \$6.84   | \$13,900  | 2.0  | \$27.90       |
| Production manager   | Operations              | \$6.47   | \$2.26   | \$8.74   | \$17,800  | 1.0  | \$17.82       |
| Total Operations     |                         |          |          |          |           | 38.0 | \$293         |
| Administrative Staff |                         |          |          |          |           |      |               |
| Franchise manager    | Overall administration  | \$11.76  | \$4.12   | \$15.88  | \$32,400  | 1.0  | \$32.40       |
| Sales manager        | Sales & marketing       | \$8.91   | \$3.12   | \$12.03  | \$24,500  | 1.0  | \$24.54       |
| Accounting           | Fiscal management       | \$7.65   | \$2.68   | \$10.32  | \$21,100  | 0.5  | \$10.53       |
| Human resources      | Personnel               | \$7.65   | \$2.68   | \$10.32  | \$21,100  | 0.5  | \$10.53       |
| Total Admin.         |                         |          |          |          |           | 3.0  | \$78          |
| Personnel Summary    |                         |          |          |          |           |      |               |
| Total Operations     |                         |          |          |          |           | 38   | \$293         |
| Total Administration |                         |          |          |          |           | 3    | \$78          |
| Total Personnel      |                         |          |          |          |           | 41   | \$371         |

Supplementary Table S3. Key parameters for the techno-economic analysis.

| <u>Parameter</u>                                      | <u>Value</u>                                  |
|-------------------------------------------------------|-----------------------------------------------|
| Discount rate                                         | 10%                                           |
| Tax rate                                              | 20%                                           |
| Capital                                               | \$29.3M                                       |
| Equity                                                | 40%                                           |
| Interest rate                                         | 8%                                            |
| Loan term                                             | 10 years                                      |
| Depreciable investment                                | 89% (\$26.0M)                                 |
| Maintenance rate (of capital)                         | 1% per year                                   |
| Insurance rate (of capital)                           | 1% per year                                   |
| Land rent (scaled to Thailand) <sup>1</sup>           | \$11.89/ha-yr                                 |
| MACRS % depreciation <sup>2</sup> , years 1-8         | 14.3, 24.5, 17.5, 12.5,<br>8.9, 8.9, 8.9, 4.5 |
| Facility life                                         | 30 years                                      |
| Algal biomass meal baseline market value <sup>3</sup> | \$1,400/MT                                    |
| Algal lipids baseline market value <sup>3</sup>       | \$1,800/MT                                    |

Supplementary Table S4: Probability distribution functions

| Parameter                                                   | Distribution law | mode  | min   | max   | mu    | sigma |
|-------------------------------------------------------------|------------------|-------|-------|-------|-------|-------|
| Productivity [g/m <sup>2</sup> -day]                        | Normal           |       |       |       | 23.4  | 4.48  |
| Lipid fraction [-]                                          | Normal           |       |       |       | 0.37  | 0.07  |
| Stoichiometric CO <sub>2</sub> [g-CO <sub>2</sub> /g-algae] | Triangular       | 1.78  | 1.23  | 1.88  |       |       |
| Efficiency of CO <sub>2</sub> absorption [-]                | Uniform          |       | 0.5   | 0.95  |       |       |
| Capacity factor [-]                                         | Triangular       | 0.90  | 0.80  | 0.98  |       |       |
| Electricity dewatering [kWh/m <sup>3</sup> ]                | Triangular       | 0.30  | 0.18  | 0.43  |       |       |
| Oil extraction efficiency [-]                               | Uniform          |       | 0.70  | 0.95  |       |       |
| Ammonia price [\$/tonne]                                    | Normal           |       |       |       | 455   | 76.0  |
| DAP price [\$/tonne]                                        | Normal           |       |       |       | 410   | 60.0  |
| Electricity price [\$/kWh]                                  | Lognormal        |       |       |       | -2.65 | 0.25  |
| Error on investment costs [%]                               | Uniform          |       | -30%  | 30%   |       |       |
| Algal oil price [\$/tonne]                                  | Normal           |       |       |       | 1.80  | 0.15  |
| Lipid-extracted algae price [\$/tonne]                      | Normal           |       |       |       | 1.40  | 0.05  |
| Geographic cost modifier [-]                                | Triangular       | 0.58  | 0.25  | 1.00  |       |       |
| CO <sub>2</sub> price [\$/kg]                               | Triangular       | 0.075 | 0.040 | 0.160 |       |       |
| PBR plastic cost [%]                                        | Uniform          |       | -30%  | +30%  |       |       |
| Heat required for extraction [%]                            | Uniform          |       | -30%  | +30%  |       |       |
| Error on labor costs [%]                                    | Uniform          |       | -30%  | +30%  |       |       |

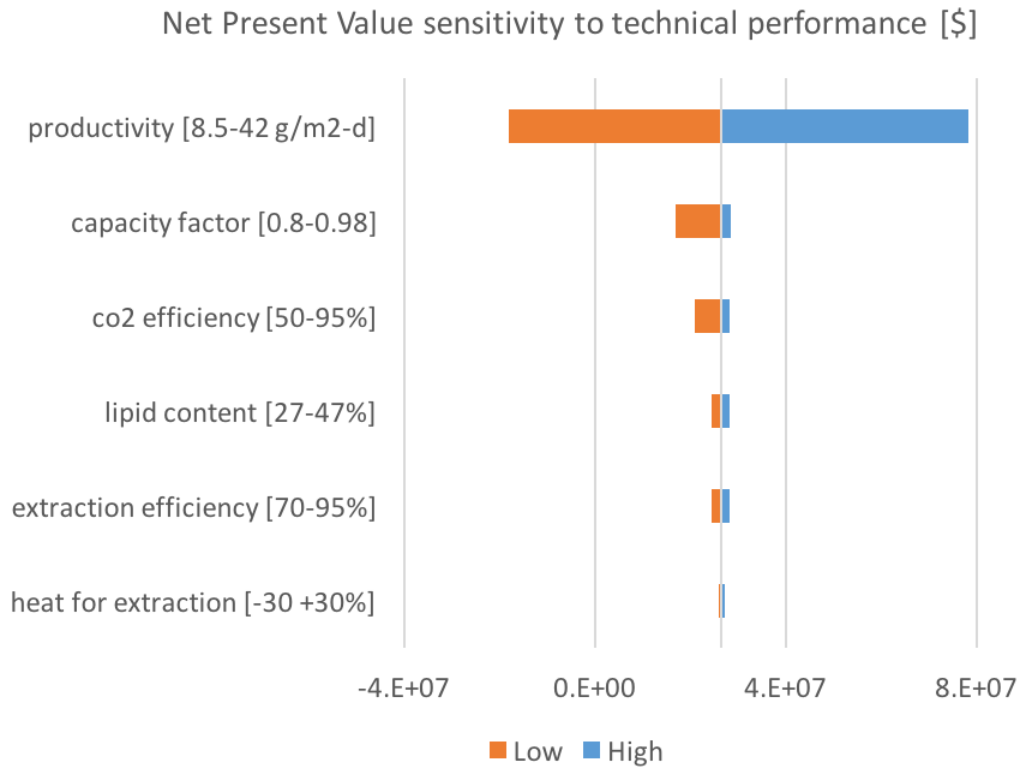

Supplementary Figure S1: Results of the sensitivity analysis for the Net Present Value (NPV) indicator.

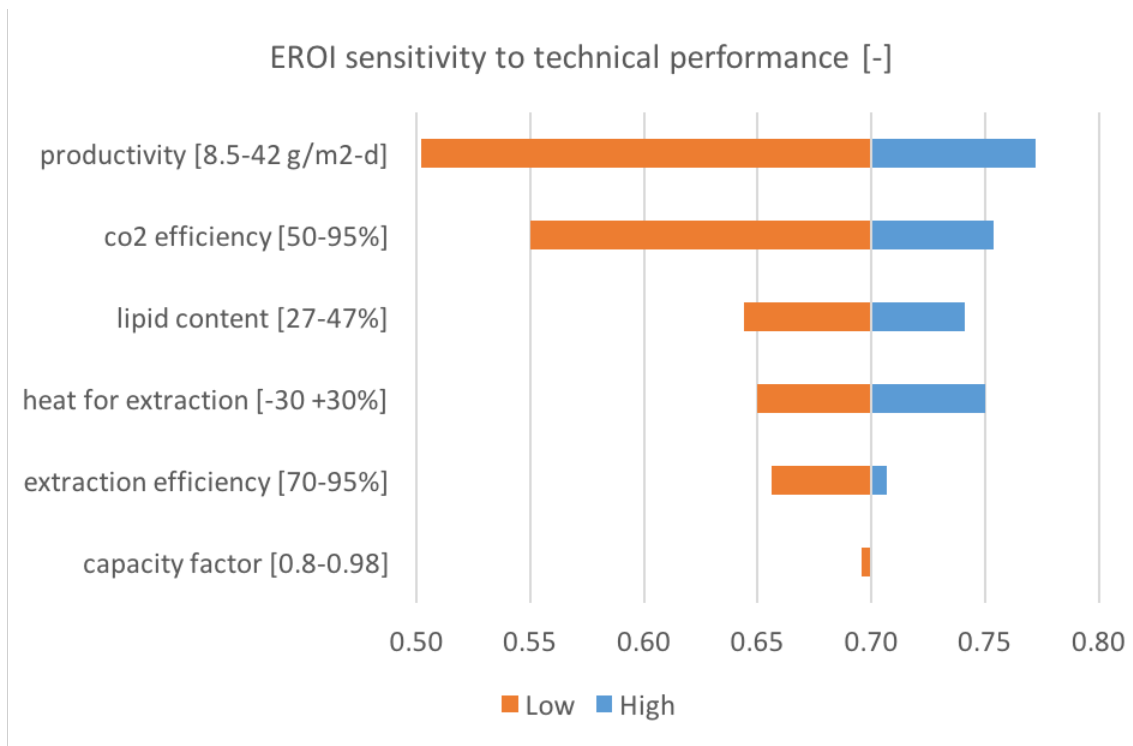

Supplementary Figure S2: Results of the sensitivity analysis for the energy return on investment (EROI) indicator.

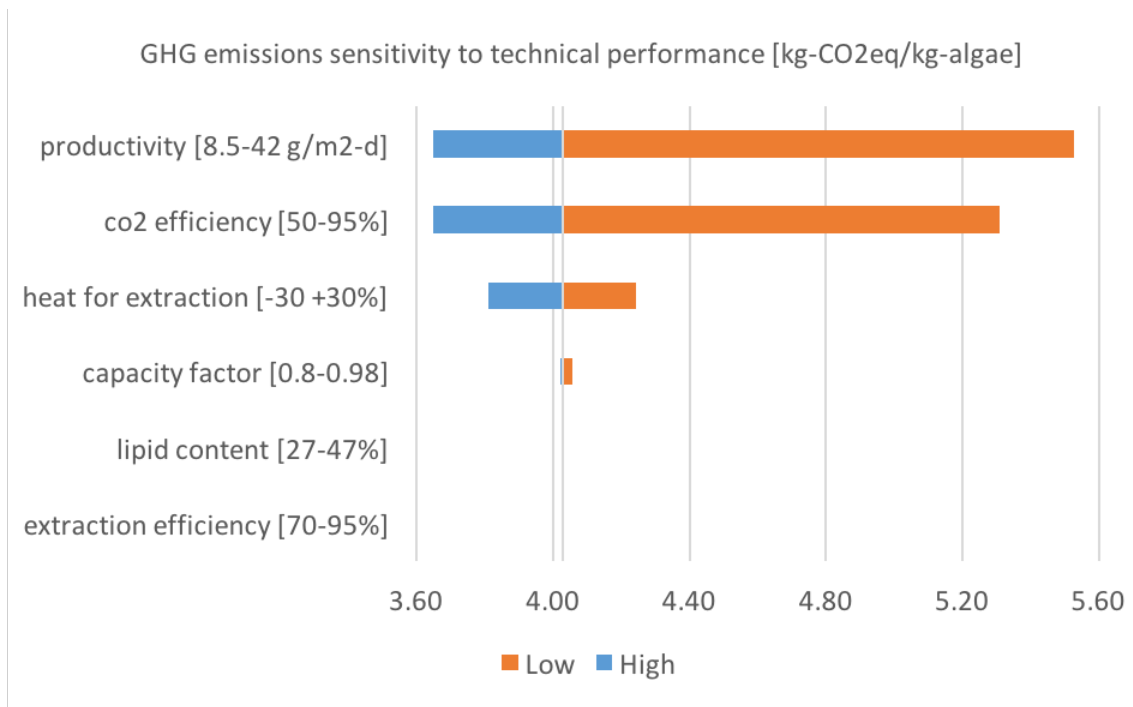

Supplementary Figure S3: Results of the sensitivity analysis for the greenhouse gases (GHG) emissions indicator.



### Supplementary Information References

1. USDA. Land Values, 2016 Summary, National Agricultural Statistics Service, ISSN: 1949-1867, 2016
2. IRS. *Publication 946 (2013), How to Depreciate Property*, 2013
3. FAO. The State of World Fisheries and Aquaculture 2016. pp. 200, Rome, 2016
